# Supplementary material for: Cu3(BTC)2 nanoflakes synthesized in an ionic liquid/water binary solvent and their catalytic properties
Source: Royal Society of Chemistry journal article supplement (doi:10.1039/d2sm00749e), 2022-01-01
Supplement: d2sm00749e1.pdf [file d2sm00749e1.pdf]

## Supplementary Materials for

### **Cu<sub>3</sub>(BTC)<sub>2</sub> nanoflakes synthesized in ionic liquid/water binary solvent and their catalytic properties**

Zhuizhui Su,<sup>a,b</sup> Jianling Zhang,<sup>\*a,b</sup> Bingxing Zhang,<sup>a,b</sup> Xiuyan Cheng,<sup>a,b</sup> Mingzhao Xu,<sup>a,b</sup> Yufei Sha,<sup>a,b</sup> Yanyue Wang,<sup>a,b</sup> Jingyang Hu,<sup>a,b</sup> Lirong Zheng<sup>c</sup> and Buxing Han<sup>a,b</sup>

<sup>a</sup>Beijing National Laboratory for Molecular Sciences, CAS Key Laboratory of Colloid, Interface and Chemical Thermodynamics, CAS Research/Education Center for Excellence in Molecular Sciences, Institute of Chemistry, Chinese Academy of Sciences, Beijing 100190, P.R.China.

<sup>b</sup>School of Chemical Sciences, University of Chinese Academy of Sciences, Beijing 100049, P.R.China.

<sup>c</sup>Beijing Synchrotron Radiation Facility (BSRF), Institute of High Energy Physics, Chinese Academy of Sciences, Beijing 100049, P.R.China.

\*Correspondence to: zhangjl@iccas.ac.cn

## Results and Discussion

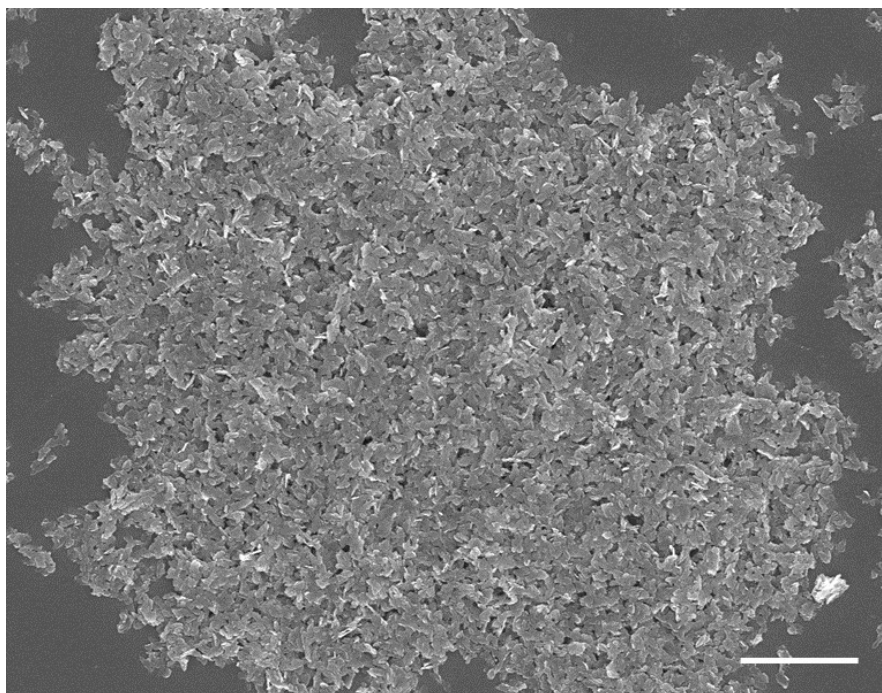

**Fig. S1.** SEM image of  $n\text{-Cu}_3(\text{BTC})_2$ . Scale bar: 3  $\mu\text{m}$ .

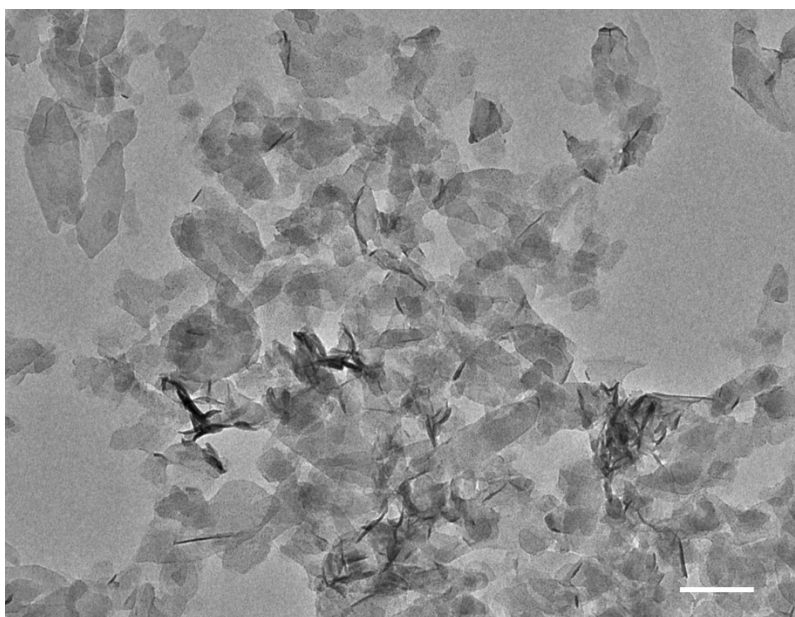

**Fig. S2.** TEM image of  $n\text{-Cu}_3(\text{BTC})_2$ . Scale bar: 200 nm.

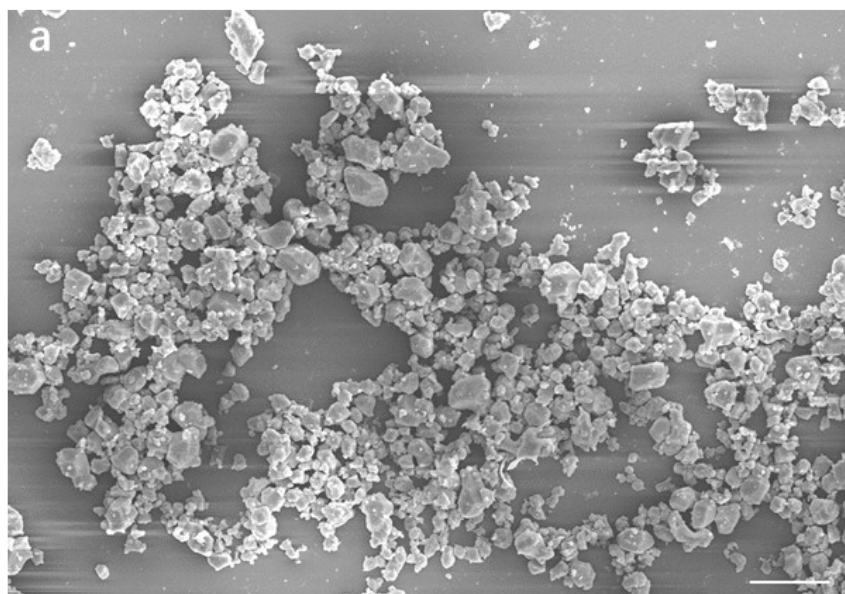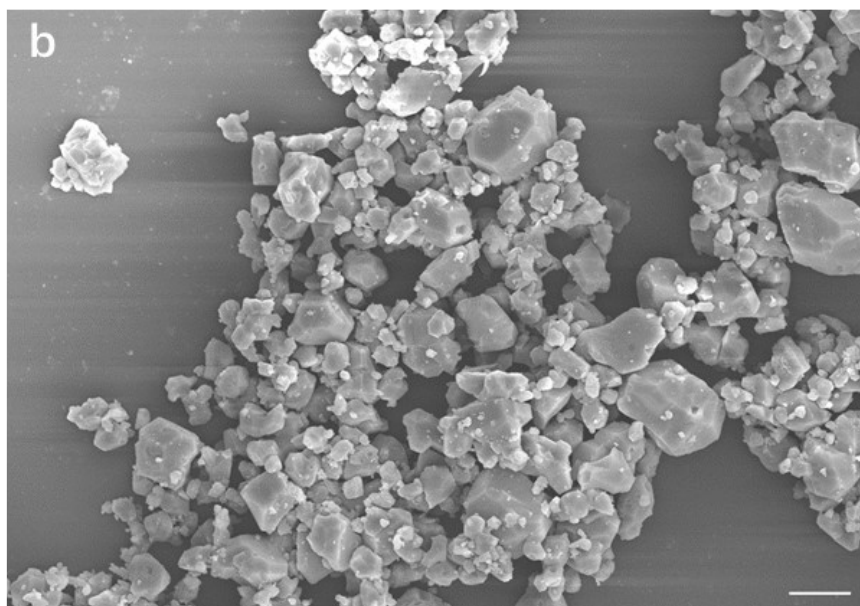

**Fig. S3.** SEM images of  $m\text{-Cu}_3(\text{BTC})_2$ . Scale bars: 30  $\mu\text{m}$  in a and 10  $\mu\text{m}$  in b.

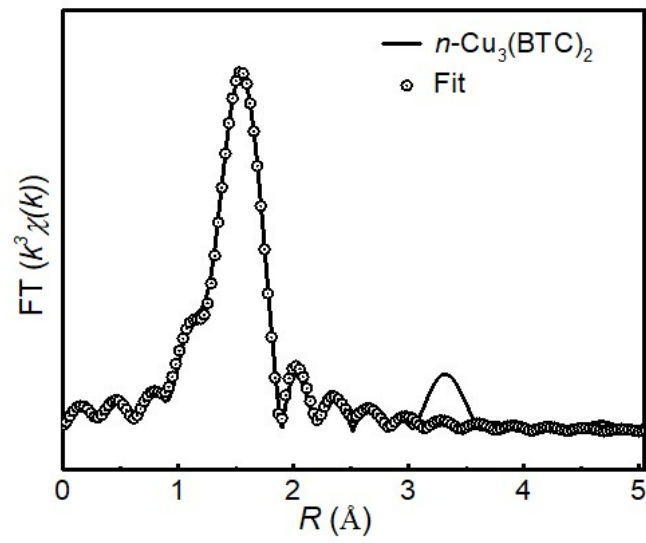

**Fig. S4.** EXAFS fitting curve of  $n\text{-Cu}_3(\text{BTC})_2$ .

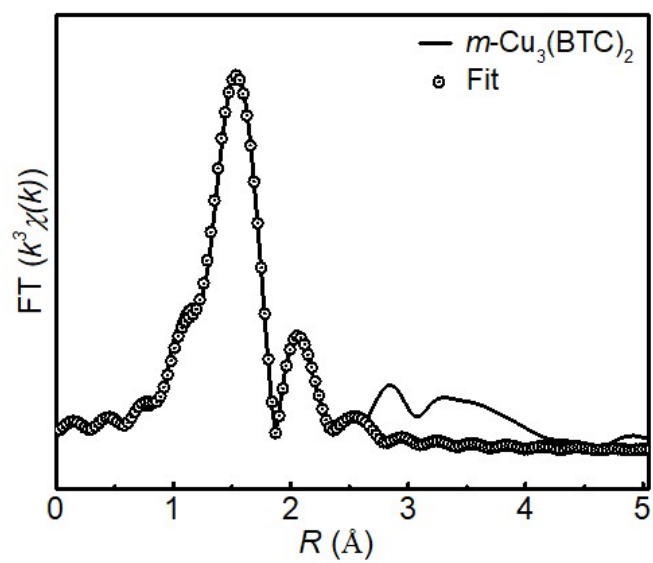

**Fig. S5.** EXAFS fitting curve of  $m\text{-Cu}_3(\text{BTC})_2$ .

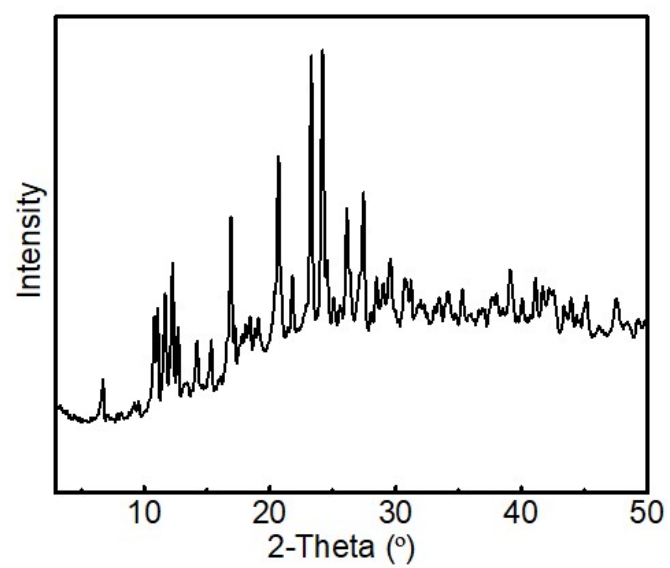

**Fig. S6.** XRD pattern of the  $\text{Cu}_3(\text{BTC})_2$  synthesized in absence of IL.

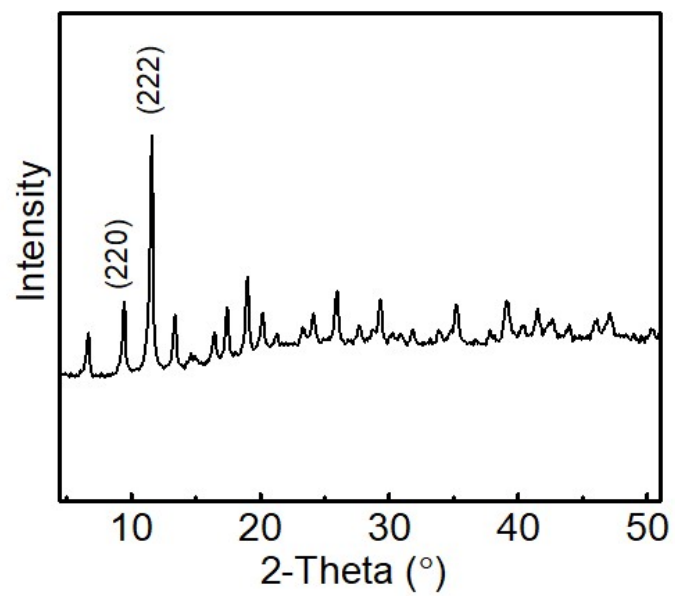

**Fig. S7.** XRD pattern of the  $\text{Cu}_3(\text{BTC})_2$  synthesized in absence of water.



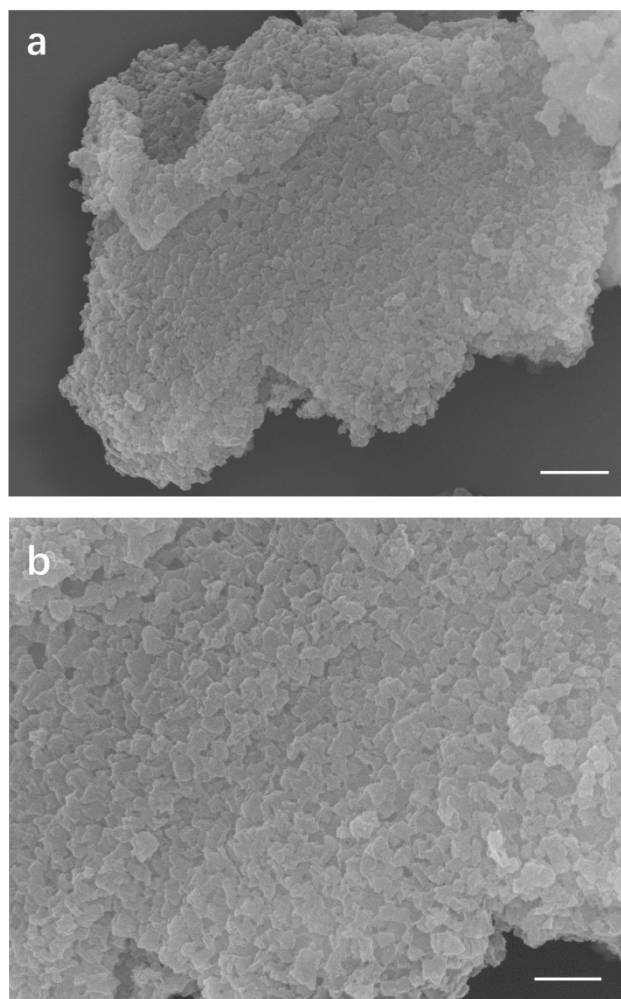

**Fig. S8.** SEM images of  $\text{Cu}_3(\text{BTC})_2$  synthesized in absence of water. Scale bars: 1  $\mu\text{m}$  in a and 500 nm in b.

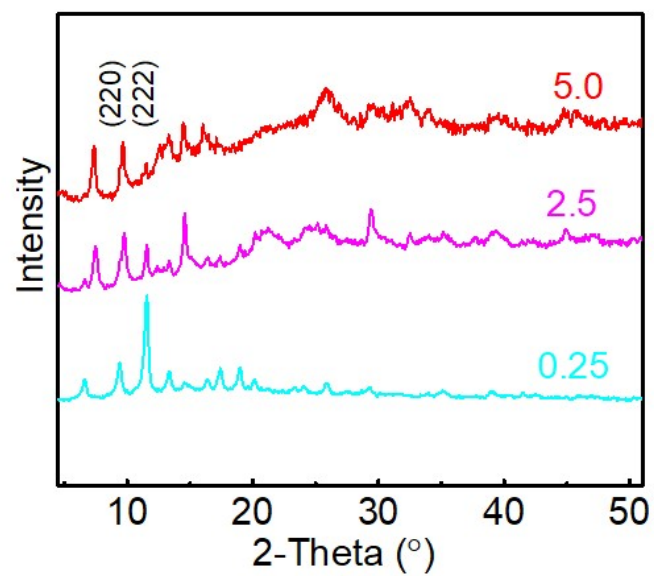

**Fig. S9.** XRD patterns of the  $\text{Cu}_3(\text{BTC})_2$  synthesized in IL/water solvent with water to IL mass ratio from 0.25 to 5.0.

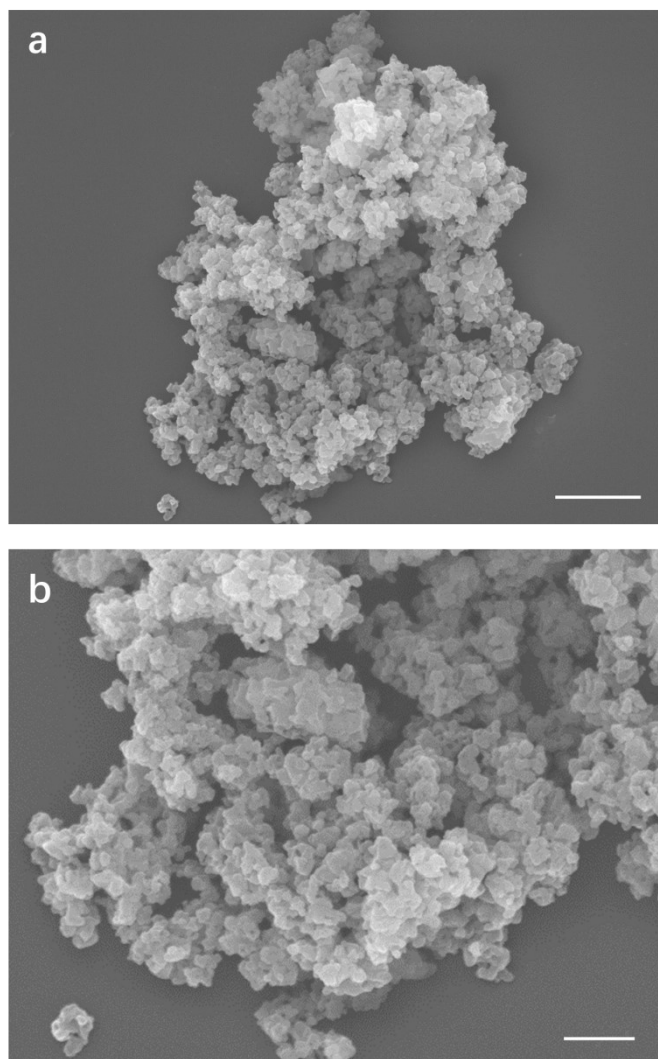

**Fig. S10.** SEM images of  $\text{Cu}_3(\text{BTC})_2$  synthesized in IL/water solvent with water to IL mass ratio of 0.25. Scale bars: 1  $\mu\text{m}$  in a and 500 nm in b.

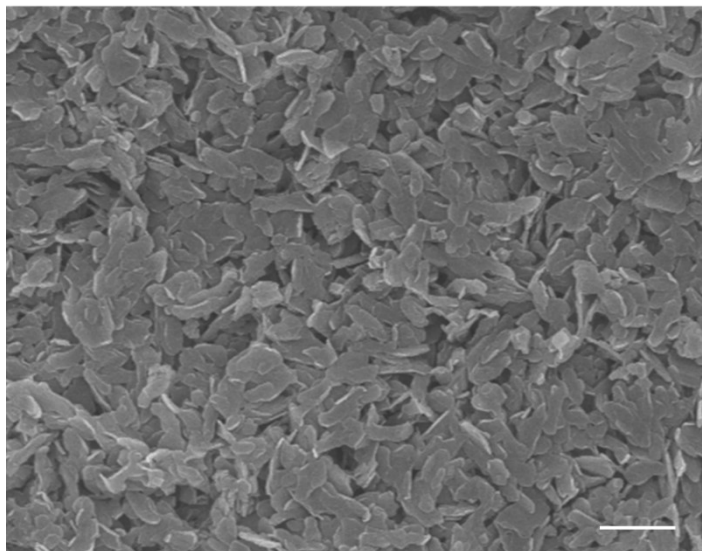

**Fig. S11.** SEM image of  $\text{Cu}_3(\text{BTC})_2$  synthesized in IL/water solvent with water to IL mass ratio of 2.5. Scale bar: 500 nm.

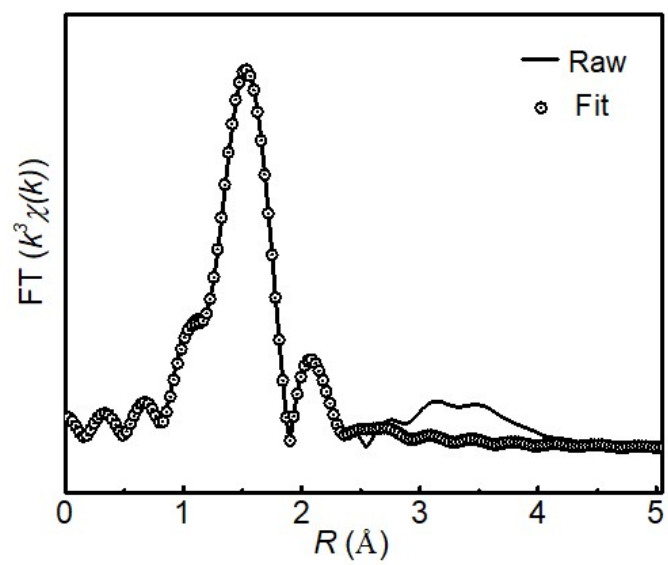

**Fig. S12.** EXAFS fitting curve of  $\text{Cu}_3(\text{BTC})_2$  synthesized in absence of water.

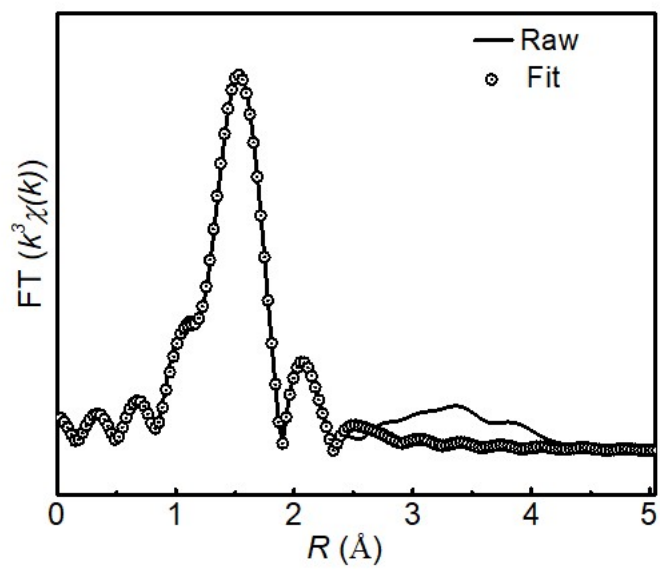

**Fig. S13.** EXAFS fitting curve of  $\text{Cu}_3(\text{BTC})_2$  synthesized in IL/water solvent with water to IL mass ratio of 0.25.

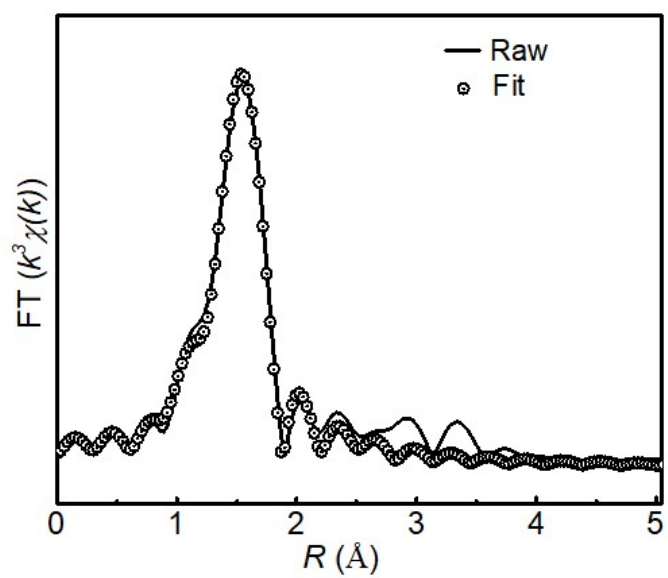

**Fig. S14.** EXAFS fitting curve of  $\text{Cu}_3(\text{BTC})_2$  synthesized in IL/water solvent with water to IL mass ratio of 2.5.

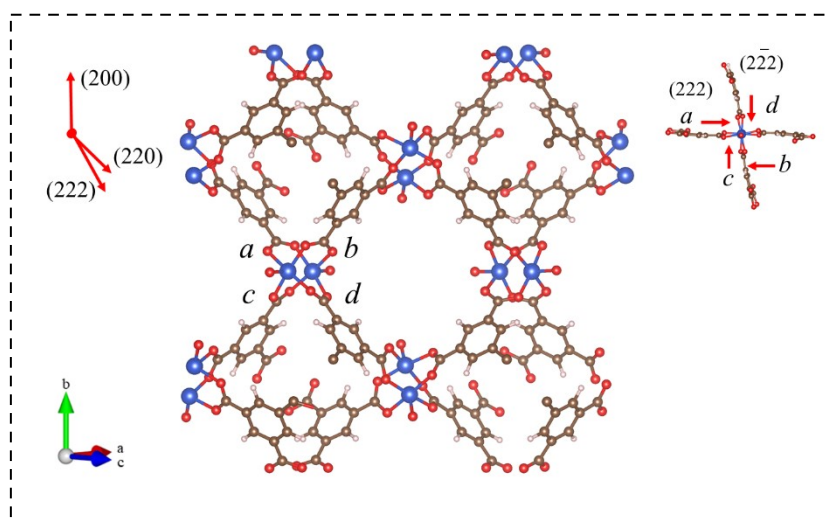

**Fig. S15.** Schematic diagram of crystal plane directions of  $\text{Cu}_3(\text{BTC})_2$ .



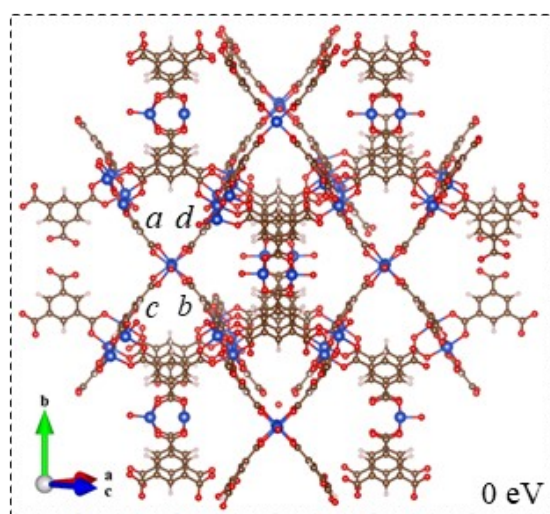

**Fig. S16.** Structure diagram of Cu<sub>3</sub>(BTC)<sub>2</sub> when the Cu-O bond is unbroken.

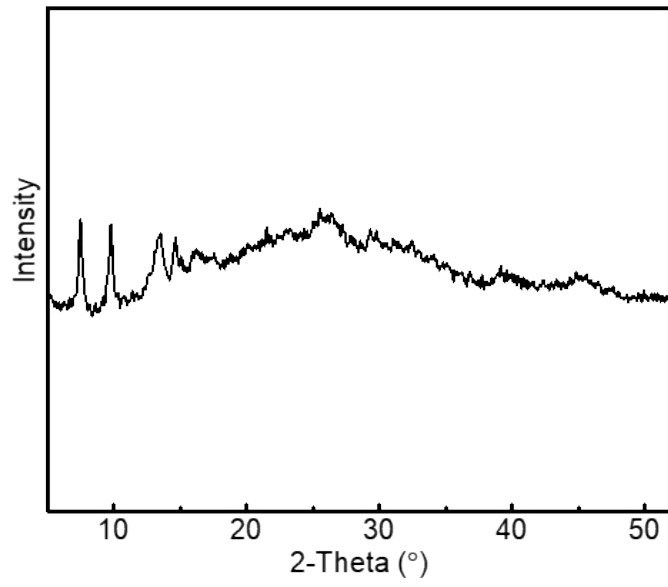

**Fig. S17.** XRD pattern of  $n\text{-Cu}_3(\text{BTC})_2$  after used for five cycles.

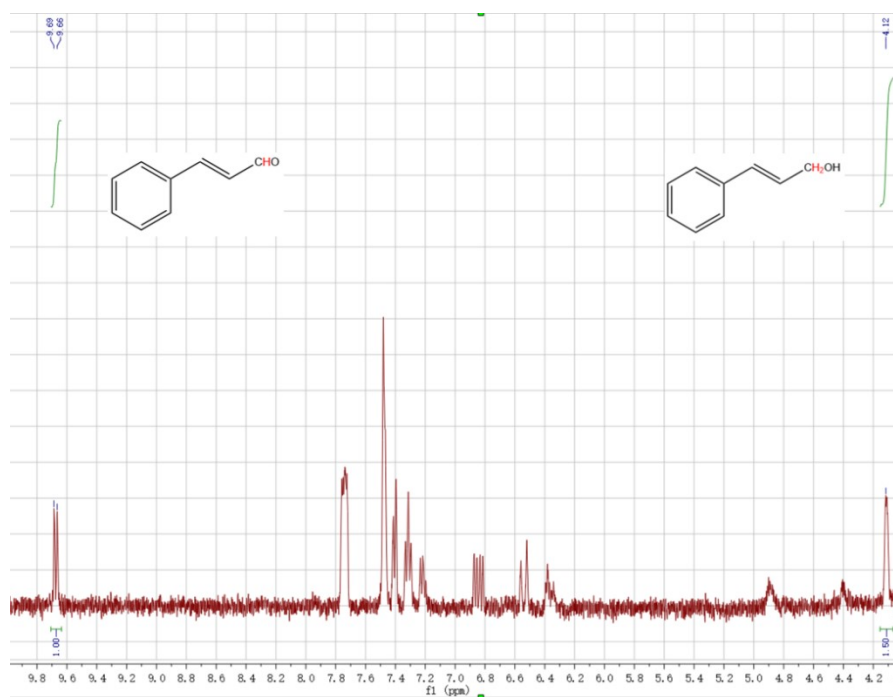

**Fig. S18.** <sup>1</sup>H NMR spectrum for the oxidation of cinnamyl alcohol catalyzed by *m*-Cu<sub>3</sub>(BTC)<sub>2</sub> at 12 h.

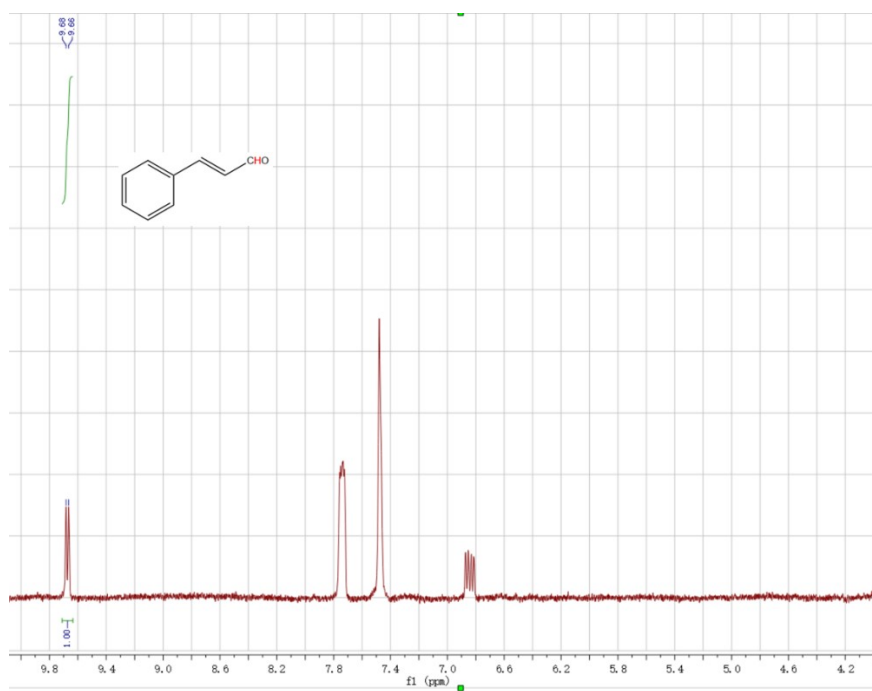

**Fig. S19.** <sup>1</sup>H NMR spectrum for the oxidation of cinnamyl alcohol catalyzed by *n*-Cu<sub>3</sub>(BTC)<sub>2</sub> at 12 h.

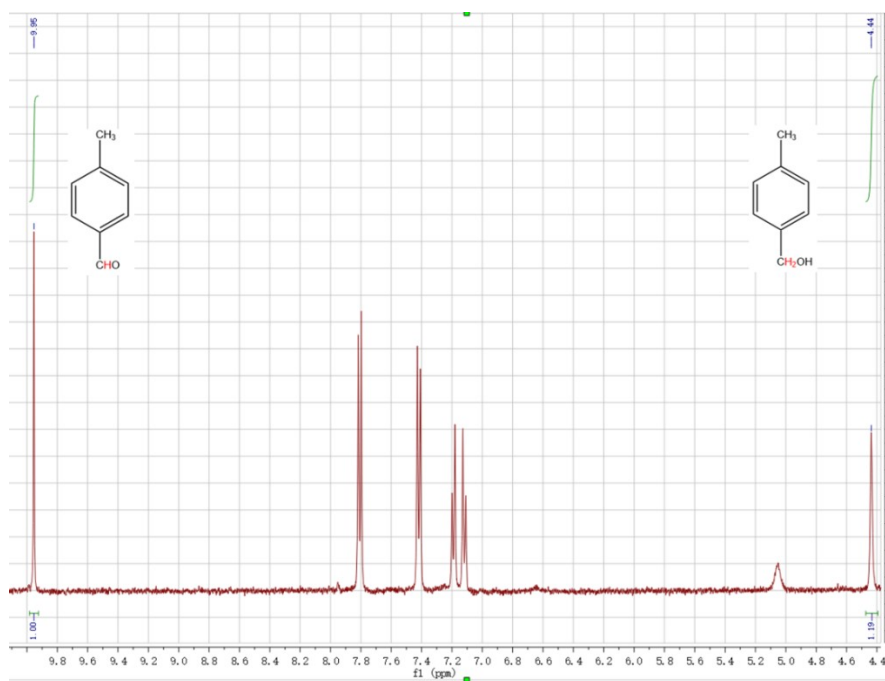

**Fig. S20.** <sup>1</sup>H NMR spectrum for the oxidation of 4-methylbenzyl alcohol catalyzed by *m*-Cu<sub>3</sub>(BTC)<sub>2</sub> at 13 h.

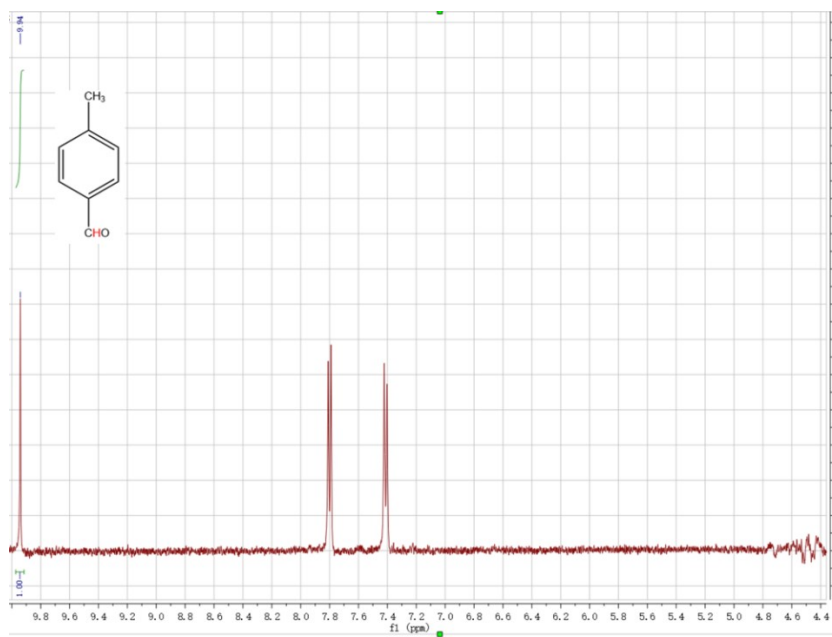

**Fig. S21.**  $^1\text{H}$  NMR spectrum for the oxidation of 4-methylbenzyl alcohol catalyzed by  $n\text{-Cu}_3(\text{BTC})_2$  at 13 h.

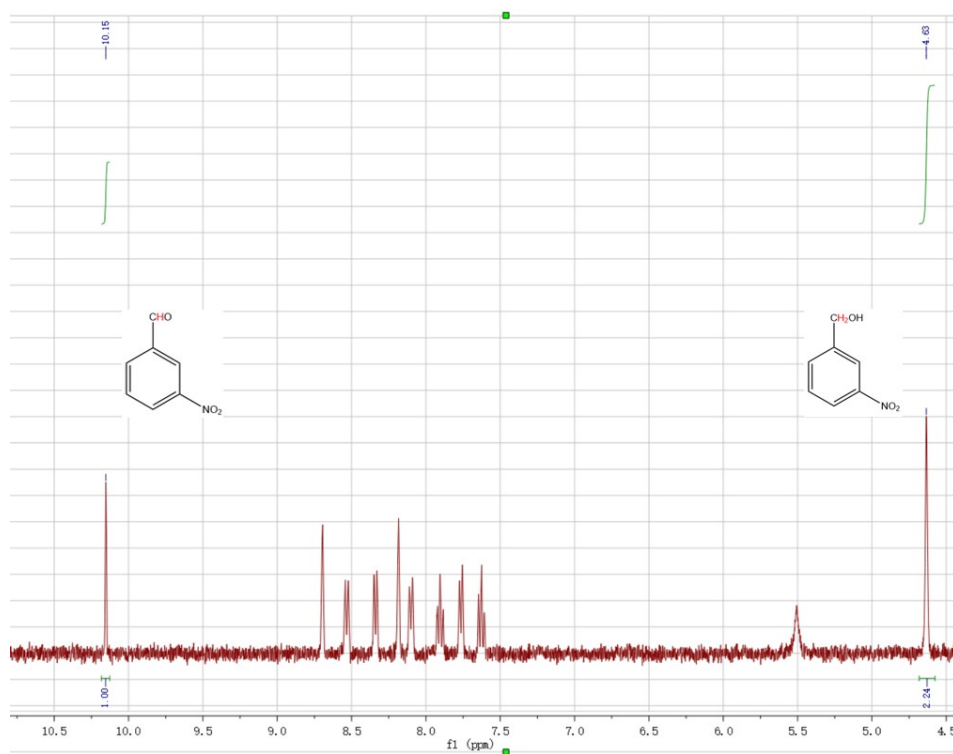

**Fig. S22.** <sup>1</sup>H NMR spectrum for the oxidation of 3-nitrobenzyl alcohol catalyzed by *m*-Cu<sub>3</sub>(BTC)<sub>2</sub> at 16 h.

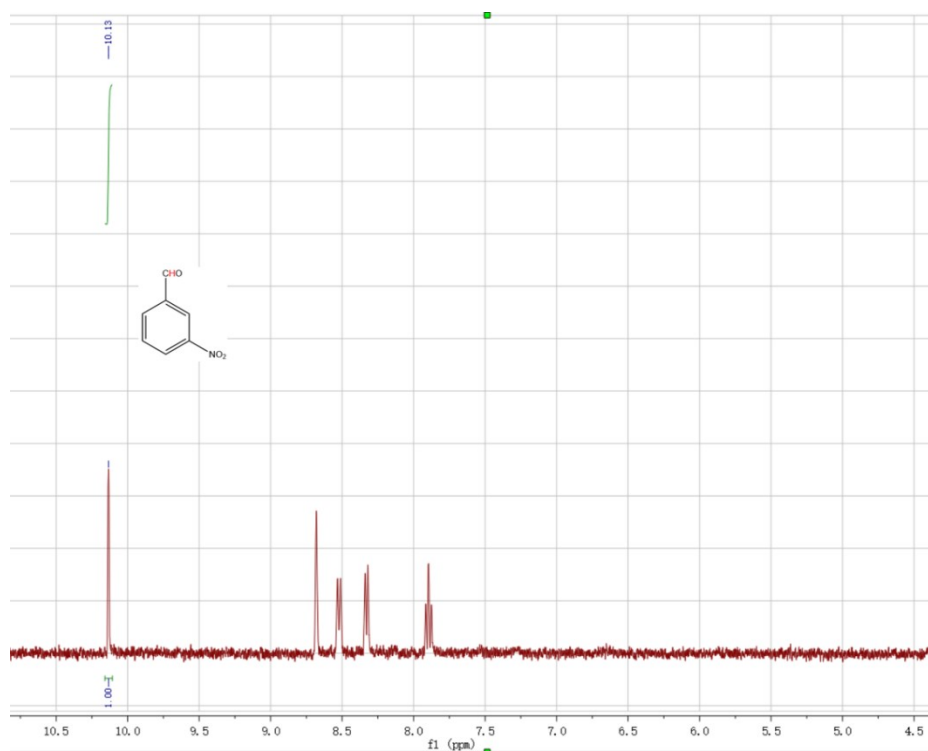

**Fig. S23.**  $^1\text{H}$  NMR spectrum for the oxidation of 3-nitrobenzyl alcohol catalyzed by *n*- $\text{Cu}_3(\text{BTC})_2$  at 16 h.



**Table S1.** High-resolution XPS spectra fitting data of O 1s for  $n\text{-Cu}_3(\text{BTC})_2$  and  $m\text{-Cu}_3(\text{BTC})_2$ .

| Sample | $n\text{-Cu}_3(\text{BTC})_2$ |           |          |
|--------|-------------------------------|-----------|----------|
|        | Position (eV)                 | FWHM (eV) | Area     |
| O 1s   |                               |           |          |
| COO    | 532.0                         | 1.937     | 35212.86 |
| Cu-O   | 531.6                         | 1.369     | 34224.01 |

The ratio of peak area of Cu-O bond to that of COO bond for  $n\text{-Cu}_3(\text{BTC})_2$  is 0.97.

| Sample | $m\text{-Cu}_3(\text{BTC})_2$ |           |          |
|--------|-------------------------------|-----------|----------|
|        | Position (eV)                 | FWHM (eV) | Area     |
| O 1s   |                               |           |          |
| COO    | 532.8                         | 2.310     | 21963.34 |
| Cu-O   | 531.9                         | 1.387     | 23446.35 |

The ratio of peak area of Cu-O bond to that of COO bond for  $m\text{-Cu}_3(\text{BTC})_2$  is 1.07.

**Table S2.** EXAFS fitting parameters at the Cu K-edge for  $n\text{-Cu}_3(\text{BTC})_2$ ,  $m\text{-Cu}_3(\text{BTC})_2$  and  $\text{Cu}_3(\text{BTC})_2$  synthesized in IL/water solvent with water to IL mass ratio from 0 to 2.5.

| Sample                        | Shell | $N^a$ | R ( $\text{\AA}$ ) <sup>b</sup> | $\sigma^2$ ( $\text{\AA}^2 \cdot 10^{-3}$ ) <sup>c</sup> | $\Delta E_0$ (eV) <sup>d</sup> | R factor (%) |
|-------------------------------|-------|-------|---------------------------------|----------------------------------------------------------|--------------------------------|--------------|
| $n\text{-Cu}_3(\text{BTC})_2$ | Cu-O  | 3.6   | 1.94                            | 3.6                                                      | 6.0                            | 0.3          |
| $m\text{-Cu}_3(\text{BTC})_2$ | Cu-O  | 5.0   | 1.95                            | 5.0                                                      | 2.8                            | 0.5          |
| 0                             | Cu-O  | 4.5   | 1.95                            | 5.6                                                      | 3.9                            | 0.1          |
| 0.25                          | Cu-O  | 4.4   | 1.95                            | 5.4                                                      | 3.7                            | 0.3          |
| 2.5                           | Cu-O  | 4.1   | 1.93                            | 3.8                                                      | 6.5                            | 0.4          |

**Table S3.** Energy barriers of water attacks Cu-O bond in *a*, *b*, *c* and *d* directions. The calculation process of energy barriers required for the fracture of (222) crystal plane, vertical plane of (222) crystal plane and (220) crystal plane.

|                         | $E^a$ (eV) | $E^b$ (eV) | $E^c$ (eV) | $E^d$ (eV) |
|-------------------------|------------|------------|------------|------------|
| $E_{2H_2O-Cu_3(BTC)_2}$ | -4551.12   | -4551.44   | -4550.19   | -4551.06   |
| $E_{Cu_3(BTC)_2}$       | -4525.48   | -4525.48   | -4525.48   | -4525.48   |
| $E_{H_2O}$              | -14.21     | -14.21     | -14.21     | -14.21     |
| $\Delta E$              | 2.78       | 2.46       | 3.71       | 2.84       |

Calculation process:

$$\Delta E_{xyz} = E_{2H_2O-Cu_3(BTC)_2} - E_{Cu_3(BTC)_2} - 2E_{H_2O};$$

$$\Delta E_{222} = (\Delta E^a + \Delta E^b)/2 = 2.62 \text{ eV};$$

$$\Delta E_{22\bar{2}} = (\Delta E^c + \Delta E^d)/2 = 3.28 \text{ eV (vertical plane of 222)};$$

$$\Delta E_{220} = \min \left( \frac{\Delta E^a + \Delta E^d}{2}, \frac{\Delta E^b + \Delta E^c}{2} \right) = \min (2.81, 3.09) \text{ eV} = 2.81 \text{ eV}.$$
